# Supplementary material for: In vivo subchronic effects of ciguatoxin-related compounds, reevaluation of their toxicity
Source: PubMed Central journal article supplement (PMC9325831; doi:10.1007/s00204-022-03315-0), 2022-06-03
Supplement: 204_2022_3315_MOESM2_ESM.pdf [file 204_2022_3315_MOESM2_ESM.pdf]

## SAFETY DATA SHEET

According to OSHA HazCom 2012  
**Revision Date** 06-Oct-2020  
 Version 1

### 1. IDENTIFICATION OF THE SUBSTANCE/PREPARATION AND OF THE COMPANY/UNDERTAKING

**Product identifier**

**Product Name** Maitotoxin

**Other means of identification**

**Product Code** 131-19011

**UN/ID No** UN3462

**Recommended use of the chemical and restrictions on use**

**Recommended Use** No information available.

**Uses advised against** No information available

**Details of the supplier of the safety data sheet****Distributor**

FUJIFILM Wako Pure Chemical Corporation . 1-2 Doshomachi 3-Chome, Chuo-ku, Osaka 540-8605, Japan Phone: +81 (0)6-6203-3741 Fax: +81 (0)6-6201-5964

FUJIFILM Wako Chemicals U.S.A., Inc. 1600 Bellwood Road, Richmond, VA 23237-1326, U.S.A. Phone: +1 (0)804-271-7677 Fax: +1 (0)804-271-7791

FUJIFILM Wako Chemicals GmbH Fuggerstrasse 12, D-41468 Neuss, Germany Phone: +49 (0)2131-311 158 Fax: +49 (0)2131-311 100

### 2. HAZARDS IDENTIFICATION

**GHS classification****Classification of the substance or mixture**

**Acute toxicity - Oral**

Category 1

**Specific target organ toxicity (single exposure)**

Category 1

**Pictograms**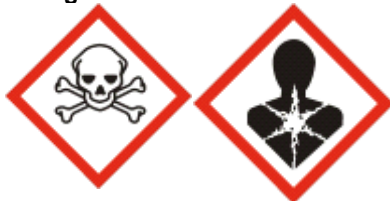**Signal word**

Danger

**Hazard statements**

H300 - Fatal if swallowed

H370 - Causes damage to organs

**Precautionary statements-(Prevention)**

Wash face, hands and any exposed skin thoroughly after handling Do not eat, drink or smoke when using this product Do not breathe dust/fume/gas/mist/vapors/spray

**Precautionary statements-(Response)**

IF exposed: Call a POISON CENTER or doctor/physician

IF SWALLOWED: Immediately call a POISON CENTER or doctor/physician Rinse mouth.

**Precautionary statements-(Storage)**

Store locked up.

**Precautionary statements-(Disposal)**

Dispose of contents/container to an approved waste disposal plant

**Others****Other hazards** Not available**3. COMPOSITION/INFORMATION ON INGREDIENTS****Single Substance or Mixture** Substance**Formula** C<sub>16</sub>H<sub>256</sub>Na<sub>2</sub>O<sub>68</sub>S<sub>2</sub>

| Chemical Name | Molecular weight | CAS RN     | Weight-% |
|---------------|------------------|------------|----------|
| Maitotoxin    | 3425.86          | 59392-53-9 | =<100    |

**Impurities and/or Additives :** Not applicable**4. FIRST AID MEASURES****First aid measures****Eye contact** Rinse thoroughly with plenty of water for at least 15 minutes, lifting lower and upper eyelids. Consult a physician.**Skin contact** Wash skin with soap and water.**Inhalation** Remove to fresh air.**Ingestion** Rinse mouth. Never give anything by mouth to an unconscious person. Call a physician or poison control center immediately. Do not induce vomiting without medical advice.**Most important symptoms and effects, both acute and delayed****Symptoms** No information available.**Indication of any immediate medical attention and special treatment needed****Note to physicians** Treat symptomatically.**5. FIRE-FIGHTING MEASURES****Suitable Extinguishing media**

Use extinguishing measures that are appropriate to local circumstances and the surrounding environment.

**Unsuitable Extinguishing media** Caution: Use of water spray when fighting fire may be inefficient.**Specific hazards arising from the chemical**

No information available.

**Explosion data****Sensitivity to Mechanical Impact** none.**Sensitivity to Static Discharge** none.**Protective equipment and precautions for firefighters**

As in any fire, wear self-contained breathing apparatus pressure-demand, MSHA/NIOSH (approved or equivalent) and full protective gear.

**6. ACCIDENTAL RELEASE MEASURES****Personal precautions, protective equipment and emergency procedures**

**Personal precautions, protective equipment and emergency procedures** Ensure adequate ventilation, especially in confined areas.

#### Environmental precautions

**Environmental precautions** See Section 12 for additional ecological information.

#### Methods and material for containment and cleaning up

**Methods and material for containment and cleaning up** Prevent further leakage or spillage if safe to do so.

**Methods for cleaning up** Pick up and transfer to properly labeled containers.

## 7. HANDLING AND STORAGE

#### Precautions for safe handling

**Technical measures** Avoid contact with strong oxidizing agents.  
**Protective measures** Handle in accordance with good industrial hygiene and safety practice.

#### Conditions for safe storage, including any incompatibilities

**Storage conditions** Container protected from light, and store tightly closed in freezer (-20°C).

**Packaging materials** Glass.

**Incompatible materials** Strong oxidizing agents.

## 8. EXPOSURE CONTROLS/PERSONAL PROTECTION

#### **Engineering controls**

In case of indoor workplace, seal the source or use a local exhaust system. Provide the safety shower facility, and hand- and eye-wash facility. And display their position clearly.

**Exposure limits** This product, as supplied, does not contain any hazardous materials with occupational exposure limits established by the region specific regulatory bodies.

#### **Personal protective equipment**

**Respiratory protection** Dust mask  
**Hand protection** Protection gloves  
**Eye protection** protective eyeglasses or chemical safety goggles  
**Skin and body protection** Long-sleeved work clothes

#### **General hygiene considerations**

Handle in accordance with good industrial hygiene and safety practice.

## 9. PHYSICAL AND CHEMICAL PROPERTIES

#### **Form**

|                                                               |                   |
|---------------------------------------------------------------|-------------------|
| <b>Appearance</b>                                             | film              |
| <b>Odor</b>                                                   | No data available |
| <b>pH</b>                                                     | No data available |
| <b>Melting point/freezing point</b>                           | No data available |
| <b>Boiling point, initial boiling point and boiling range</b> | No data available |
| <b>Flash point</b>                                            | No data available |
| <b>Evaporation rate:</b>                                      | No data available |
| <b>Flammability (solid, gas):</b>                             | No data available |
| <b>Upper/lower flammability or explosive limits</b>           |                   |
| <b>Upper :</b>                                                | No data available |
| <b>Lower :</b>                                                | No data available |

|                                                 |                             |
|-------------------------------------------------|-----------------------------|
| Vapour pressure                                 | No data available           |
| Vapour density                                  | No data available           |
| Specific Gravity / Relative density             | No data available           |
| Solubilities                                    | methanol , DMSO : soluble . |
| n-Octanol/water partition coefficient:(log Pow) | No data available           |
| Auto-ignition temperature:                      | No data available           |
| Decomposition temperature:                      | No data available           |
| Viscosity (coefficient of viscosity)            | No data available           |
| Dynamic viscosity                               | No data available           |

## 10. STABILITY AND REACTIVITY

### Stability

|                           |                          |
|---------------------------|--------------------------|
| <b>Chemical stability</b> | May be altered by light. |
| <b>Reactivity</b>         | No data available        |

### Hazardous reactions

None under normal processing

### Conditions to avoid

Extremes of temperature and direct sunlight

### Incompatible materials

Strong oxidizing agents

### Hazardous decomposition products

Carbon monoxide (CO), Carbon dioxide (CO<sub>2</sub>), Sulfur oxides (SO<sub>x</sub>)

## 11. TOXICOLOGICAL INFORMATION

|                       |                   |
|-----------------------|-------------------|
| <b>Acute toxicity</b> | No data available |
|-----------------------|-------------------|

|                                          |                   |
|------------------------------------------|-------------------|
| <b>Skin irritation/corrosion</b>         | No data available |
| <b>Serious eye damage/ irritation</b>    | No data available |
| <b>Respiratory or skin sensitization</b> | No data available |
| <b>Reproductive cell mutagenicity</b>    | No data available |
| <b>Carcinogenicity</b>                   | No data available |

|                               |                   |
|-------------------------------|-------------------|
| <b>Reproductive toxicity</b>  | No data available |
| <b>STOT-single exposure</b>   | No data available |
| <b>STOT-repeated exposure</b> | No data available |
| <b>Aspiration hazard</b>      | No data available |

## 12. ECOLOGICAL INFORMATION

### Ecotoxicity

No information available

### Persistence and degradability

No information available

### Bioaccumulative potential

No information available

### Mobility in soil

No information available

### Other Data

No information available

## 13. DISPOSAL CONSIDERATIONS

**Waste treatment methods**

**Disposal of wastes** Disposal should be in accordance with applicable regional, national and local laws and regulations.

**Precautionary including method of disposing contaminated packaging** Disposal should be in accordance with applicable regional, national and local laws and regulations.

|                                  |
|----------------------------------|
| <b>14. TRANSPORT INFORMATION</b> |
|----------------------------------|

**DOT**

|                                |                                                                   |
|--------------------------------|-------------------------------------------------------------------|
| <b>UN/ID No</b>                | UN3462                                                            |
| <b>Proper shipping name:</b>   | Toxins, extracted from living sources, solid, n.o.s. (Maitotoxin) |
| <b>UN classification</b>       | 6.1                                                               |
| <b>Subsidiary hazard class</b> |                                                                   |
| <b>Packing group</b>           | I                                                                 |
| <b>Marine pollutant</b>        | Not applicable                                                    |

**IATA**

|                                            |                                                                   |
|--------------------------------------------|-------------------------------------------------------------------|
| <b>UN/ID No</b>                            | UN3462                                                            |
| <b>Proper shipping name:</b>               | Toxins, extracted from living sources, solid, n.o.s. (Maitotoxin) |
| <b>UN classification</b>                   | 6.1                                                               |
| <b>Subsidiary hazard class</b>             |                                                                   |
| <b>Packing group</b>                       | I                                                                 |
| <b>Environmentally Hazardous Substance</b> | Not applicable                                                    |

**IMDG**

|                                |                                                                   |
|--------------------------------|-------------------------------------------------------------------|
| <b>UN/ID No</b>                | UN3462                                                            |
| <b>Proper shipping name:</b>   | Toxins, extracted from living sources, solid, n.o.s. (Maitotoxin) |
| <b>UN classification</b>       | 6.1                                                               |
| <b>Subsidiary hazard class</b> |                                                                   |
| <b>Packing group</b>           | I                                                                 |
| <b>Marine pollutant (Sea)</b>  | Not applicable                                                    |

|                                   |
|-----------------------------------|
| <b>15. REGULATORY INFORMATION</b> |
|-----------------------------------|

**International Inventories**

|             |   |
|-------------|---|
| <b>TSCA</b> | - |
| <b>DSL</b>  | - |
| <b>NDSL</b> | - |

**Legend:**

*TSCA - United States Toxic Substances Control Act Section 8(b) Inventory*

*DSL/NDSL - Canadian Domestic Substances List/Non-Domestic Substances List*

**US Federal Regulations****SARA 313**

Section 313 of Title III of the Superfund Amendments and Reauthorization Act of 1986 (SARA). This product does not contain any chemicals which are subject to the reporting requirements of the Act and Title 40 of the Code of Federal Regulations, Part 372

**SARA 311/312 Hazard Categories**

|                                          |    |
|------------------------------------------|----|
| <b>Acute health hazard</b>               | No |
| <b>Chronic Health Hazard</b>             | No |
| <b>Fire hazard</b>                       | No |
| <b>Sudden release of pressure hazard</b> | No |
| <b>Reactive Hazard</b>                   | No |

**CWA (Clean Water Act)**

This product does not contain any substances regulated as pollutants pursuant to the Clean Water Act (40 CFR 122.21 and 40 CFR 122.42)

**CERCLA**

This material, as supplied, does not contain any substances regulated as hazardous substances under the Comprehensive Environmental Response Compensation and Liability Act (CERCLA) (40 CFR 302) or the Superfund Amendments and Reauthorization Act (SARA) (40 CFR 355). There may be specific reporting requirements at the local, regional, or state level pertaining to releases of this material

**US State Regulations****California Proposition 65**

This product does not contain any chemicals regulated by Proposition 65

**U.S. State Right-to-Know Regulations****U.S. EPA Label Information**

**EPA Pesticide Registration Number** Not applicable

|                              |
|------------------------------|
| <b>16. OTHER INFORMATION</b> |
|------------------------------|

**Issue Date** 05-Oct-2020

**Revision Date** 06-Oct-2020

**Revision Note**

No information available

**Disclaimer**

**The information provided in this Material Safety Data Sheet is correct to the best of our knowledge, information and belief at the date of its publication. The information given is designed only as a guidance for safe handling, use, processing, storage, transportation, disposal and release and is not to be considered a warranty or quality specification. The information relates only to the specific material designated and may not be valid for such material used in combination with any other materials or in any process, unless specified in the text.**

**End of Safety Data Sheet**

**Suitable extinguishing media**

Water spray (fog), Carbon dioxide (CO<sub>2</sub>), Foam, Extinguishing powder, Sand

**Unsuitable extinguishing media**

No information available

**Special extinguishing method**

No information available

**Specific hazards arising from the chemical product**

Thermal decomposition can lead to release of irritating and toxic gases and vapors.

**Special protective actions for****fire-fighters**

Use personal protective equipment as required. Firefighters should wear self-contained breathing apparatus and full firefighting turnout gear.
