# Supplementary material for: In vivo subchronic effects of ciguatoxin-related compounds, reevaluation of their toxicity
Source: PubMed Central journal article supplement (PMC9325831; doi:10.1007/s00204-022-03315-0), 2022-06-03
Supplement: 204_2022_3315_MOESM3_ESM.pdf [file 204_2022_3315_MOESM3_ESM.pdf]

## SAFETY DATA SHEET

According to OSHA HazCom 2012  
**Revision Date** 23-Oct-2019  
 Version 2.01

**Details of the supplier of the safety data sheet**

**Distributor**

FUJIFILM Wako Pure Chemical Corporation . 1-2 Doshomachi 3-Chome, Chuo-ku, Osaka 540-8605, Japan Phone: +81 (0)6-6203-3741 Fax: +81 (0)6-6201-5964  
 FUJIFILM Wako Chemicals USA, Inc. 1600 Bellwood Road, Richmond, VA 23237-1326, U.S.A. Phone: +1 (0)804-271-7677 Fax: +1 (0)804-271-7791  
 FUJIFILM Wako Chemicals GmbH Fuggerstrasse 12, D-41468 Neuss, Germany Phone: +49 (0)2131-311 158 Fax: +49 (0)2131-311 100

### 2. HAZARDS IDENTIFICATION

| 1. IDENTIFICATION OF THE SUBSTANCE/PREPARATION AND OF THE COMPANY/UNDERTAKING |            |
|-------------------------------------------------------------------------------|------------|
| <b>GHS classification</b>                                                     |            |
| <b>Classification of the substance or mixture</b>                             |            |
| <b>Acute toxicity - Oral</b>                                                  | Category 1 |
| <b>Specific target organ toxicity (single exposure)</b>                       | Category 1 |
| <b>Category 1</b> nervous system                                              |            |
| <b>Pictograms</b>                                                             |            |

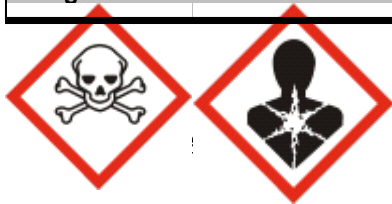

**Signal words of identification** Danger  
**Product Code** CiguatoxinCTX 3C

**Hazard statements**  
 H300 - Fatal if swallowed  
 H370 - Causes damage to the following organs: nervous system

**Precautionary statements-(Prevention)**  
 Wash face, hands and any exposed skin thoroughly after handling Do not eat, drink or smoke when using this product Do not breathe dust/fume/gas/mist/vapors/spray

**Precautionary statements-(Response)**  
 IF exposed: Call a POISON CENTER or doctor/physician  
 IF SWALLOWED: Immediately call a POISON CENTER or doctor/physician Rinse mouth.

**Precautionary statements-(Storage)** UN3462

Store locked up.

**Precautionary statements-(Disposal)**

Dispose of contents/container to an approved waste disposal plant

**Others**

**Other hazards** Not available

### 3. COMPOSITION/INFORMATION ON INGREDIENTS

**Single Substance or Mixture** Substance

**Formula** C57H82O16

| Chemical Name     | Molecular weight | CAS RN      | Weight-% |
|-------------------|------------------|-------------|----------|
| Ciguatoxin CTX 3C | 1023.25          | 148471-85-6 | 100      |

**Impurities and/or Additives :** Not applicable

### 4. FIRST AID MEASURES

**First aid measures**

**Eye contact** Rinse thoroughly with plenty of water for at least 15 minutes, lifting lower and upper eyelids. Consult a physician.

**Skin contact** Wash skin with soap and water.

**Inhalation** Remove to fresh air.

**Ingestion** Rinse mouth. Never give anything by mouth to an unconscious person. Call a physician or poison control center immediately. Do not induce vomiting without medical advice.

**Most important symptoms and effects, both acute and delayed**

**Symptoms** No information available.

**Indication of any immediate medical attention and special treatment needed**

**Note to physicians** Treat symptomatically.

### 5. FIRE-FIGHTING MEASURES

**Suitable Extinguishing media**

Use extinguishing measures that are appropriate to local circumstances and the surrounding environment.

**Unsuitable Extinguishing media** Caution: Use of water spray when fighting fire may be inefficient.

**Specific hazards arising from the chemical**

No information available.

**Explosion data**

**Sensitivity to Mechanical Impact** none.

**Sensitivity to Static Discharge** none.

**Protective equipment and precautions for firefighters**

As in any fire, wear self-contained breathing apparatus pressure-demand, MSHA/NIOSH (approved or equivalent) and full protective gear.

### 6. ACCIDENTAL RELEASE MEASURES
